# Supplementary material
Source: ML conference proceedings conference paper supplement (https://openreview.net/forum?id=RMaRBE9s2H)

RGB

2DGS

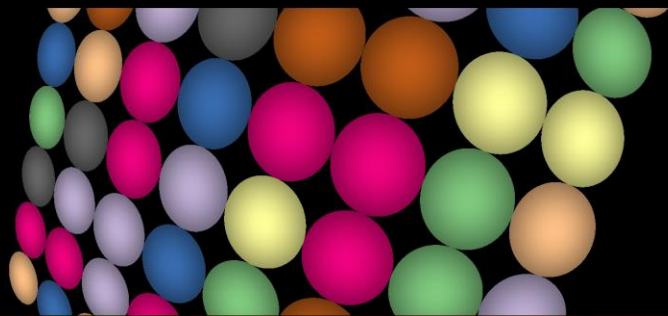

3DGS

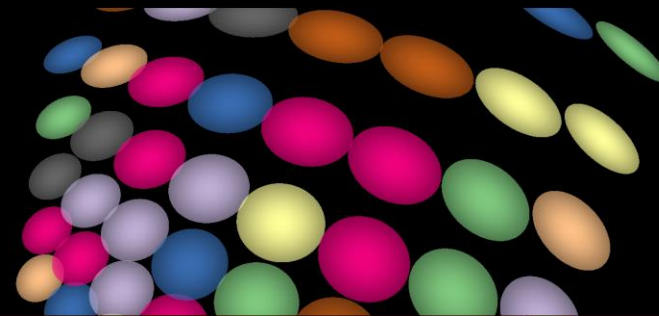

Depth

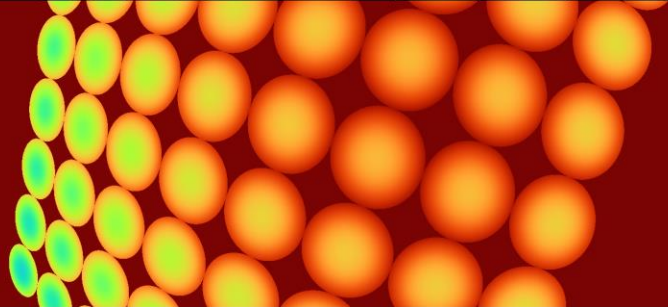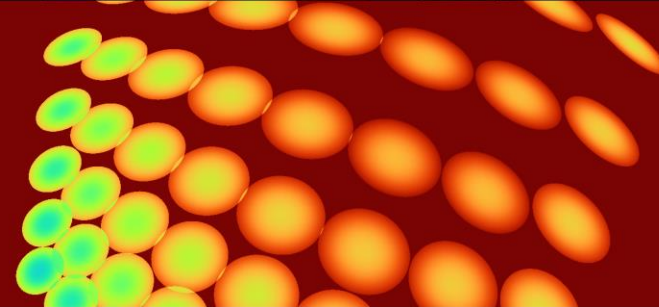

Supplement: supplementary_material [file attachment]
